# Supplementary material for: Using Medicinal Plants in Valmalenco (Italian Alps): From Tradition to Scientific Approaches
Source: MDPI journal article supplement (doi:10.3390/molecules25184144), 2020-09-10
Supplement: s1 [file s1]

# Using Medicinal Plants in Valmalenco (Italian Alps): from Tradition to Scientific Approaches

Martina Bottoni <sup>1,2</sup>, Fabrizia Milani <sup>1,2</sup>, Lorenzo Colombo <sup>1,2</sup>, Kevin Nallio <sup>1,2</sup>, Paola Sira Colombo <sup>1,2</sup>, Claudia Giuliani <sup>1,2</sup>, Piero Bruschi <sup>3</sup> and Gelsomina Fico <sup>1,2,\*</sup>

<sup>1</sup> Department of Pharmaceutical Science, University of Milan, Milan 20133, Italy; martina.bottoni@unimi.it (M.B.); fabrizia.milani@unimi.it (F.M.); lorecolo.93@gmail.com (L.C.); kevin.nallio@studenti.unimi.it (K.N.); pasico19@virgilio.it (P.S.C.); claudia.giuliani@unimi.it (C.G.)

<sup>2</sup> Botanical Garden G.E. Ghirardi, Department of Pharmaceutical Science, University of Milan, Toscolano Maderno, Brescia 25088, Italy

<sup>3</sup> Department of Agricultural, Environmental, Food and Forestry Science and Technology, University of Florence, Florence 50144 code, Italy; piero.bruschi@unifi.it

\* Correspondence: gelsomina.fico@unimi.it

Received: 7 August 2020; Accepted: 4 September 2020; Published: date

**Abstract:** This ethnobotanical survey was carried out in Caspoggio (Valmalenco, SO, Italy) with the purpose of investigating the traditional uses of medicinal plants. Moreover, a bibliographic research meant to validate or refute the uses, focusing on the potentially responsible compounds, was performed. Fifty-nine species, attributable to 30 families (Asteraceae, Pinaceae, Malvaceae, and Lamiaceae the most cited), were mentioned. *Arnica montana*, anti-inflammatory for traumas and musculoskeletal pains; *Pinus mugo*, expectorant; *Malva sylvestris*, anti-inflammatory and soothing; *Achillea moschata*, digestive. The compounds, responsible for the therapeutic activities, are often polyphenols and terpenoids: helenanin in *A. montana*,  $\alpha$ -pinene,  $\delta$ -3-carene, and limonene in *P. mugo*, gossypin and malvin in *M. sylvestris*, luteolin and apigenin in *A. moschata*. Scientific evidence for at least one of the traditional activities described was found for 50 species but only in 26 out of 196 works consulted, it is possible to make a comparison between investigated extracts and traditional preparations. This study is thus a stimulus to new phytochemical investigations, mimicking as much as possible the traditional preparations. This work is part of the European Interreg Italy-Switzerland B-ICE project, aimed at creating a management model for the ongoing climate change and searching for new sources of territory valorization as attractions for tourists.

**Keywords:** Valmalenco; ethnobotany; traditional uses; medicinal plants; climate change

**Table S1.** Bibliographic research on plants used for human and animal healthcare. For the complete Reference list, please see the main text.

| Latin name<br>Vernacular name                                   | Traditional uses in Valmalenco                                           |              |                                                           |                                                                            | Bibliographic reference: Ethnobotany                | Bibliographic reference: Biological activity      | Bibliographic reference: Active compounds                                                                                                                                                                                                                                                             |
|-----------------------------------------------------------------|--------------------------------------------------------------------------|--------------|-----------------------------------------------------------|----------------------------------------------------------------------------|-----------------------------------------------------|---------------------------------------------------|-------------------------------------------------------------------------------------------------------------------------------------------------------------------------------------------------------------------------------------------------------------------------------------------------------|
|                                                                 | Part of the plant and preparation                                        | Field of use | Category of use                                           | Detailed use                                                               |                                                     |                                                   |                                                                                                                                                                                                                                                                                                       |
| <b>Adoxaceae</b>                                                |                                                                          |              |                                                           |                                                                            |                                                     |                                                   |                                                                                                                                                                                                                                                                                                       |
| <i>Sambucus nigra</i> L.<br>Sambuco nero<br>Sembüc              | Fruits/infructescences/accessory fruits (eaten raw)                      | Med          | Digestive tract disorders                                 | Laxative, intestinal motility                                              | [3,15,153]                                          | [153]                                             | Anthocyanins (Cyanidin-3-sambubioside, Chrysanthemin, Cyanidin-3,5-diglucoside); Proanthocyanidins (epicatechin); Flavonoids (Rutin, isoquercetin); Peptic polysaccharides; Lectins (SNA-IV, SNA-V) of berries extracts: immunostimulant, antiviral (against flu), and antimicrobial activities [155] |
|                                                                 | Flowers/inflorescences/flowering tops (infusion)                         | Med          | Gynecological disorders, obstetric and puerperal problems | Galactagogue                                                               |                                                     |                                                   |                                                                                                                                                                                                                                                                                                       |
|                                                                 | Flowers/inflorescences/flowering tops (infusion in water or milk, syrup) | Med          | Respiratory tract infections                              | Bronchitis<br>Asthmatic bronchitis<br>Expectorant, decongestant, emollient | [3,13,14,15,19,155,204,205,206]                     | [154,155,156]                                     |                                                                                                                                                                                                                                                                                                       |
|                                                                 | Fruits/infructescences/accessory fruits (eaten raw)                      |              |                                                           | Sorethroat and hoarseness<br>Cough                                         |                                                     |                                                   |                                                                                                                                                                                                                                                                                                       |
| <b>Apiaceae</b>                                                 |                                                                          |              |                                                           |                                                                            |                                                     |                                                   |                                                                                                                                                                                                                                                                                                       |
| <i>Foeniculum vulgare</i> Mill.<br>Finocchio selvatico, aneto   | Epigeal part (Whole) (infusion)                                          | Med          | Digestive tract disorders                                 | Gastric antispasmodic<br>Digestive<br>Carminative<br>Stomachache           | WHO Monograph - Fructus Foeniculi [29] [69,206,207] | WHO Monograph - Fructus Foeniculi [29] [31,69,70] | E.O.: antispasmodic, carminative, anticolitic [69,70]                                                                                                                                                                                                                                                 |
| <b>Asteraceae</b>                                               |                                                                          |              |                                                           |                                                                            |                                                     |                                                   |                                                                                                                                                                                                                                                                                                       |
| <i>Achillea millefolium</i> L.<br>Achillea millefoglio, danedun | Epigeal part (Whole) (compresses with infusion)                          | Med          | Skin diseases and traumas                                 | Anti-inflammatory, disinfectant and wound healing, Emollient, soothing     | OMS Monograph - Herba Millefolii [23]               | [25] (Anti-inflammatory, antibacterial)           | Sesquiterpene santamarin: anti-inflammatory (OMS)                                                                                                                                                                                                                                                     |

|                                                       |     |                                                           |                                                                                   |                    |                                                                                           |                                                                                                                                                                                                                                                                                                                                                                                            |
|-------------------------------------------------------|-----|-----------------------------------------------------------|-----------------------------------------------------------------------------------|--------------------|-------------------------------------------------------------------------------------------|--------------------------------------------------------------------------------------------------------------------------------------------------------------------------------------------------------------------------------------------------------------------------------------------------------------------------------------------------------------------------------------------|
|                                                       |     |                                                           |                                                                                   | [3,13,15,18,25]    | [24]<br>(Antibacterial)                                                                   | Monograph - Herba Millefolii [23]                                                                                                                                                                                                                                                                                                                                                          |
| Flowers/inflorescences/flowering tops (infusion)      | Med | Circulatory system disorders                              | Blood depurative                                                                  | [3,25]             |                                                                                           | Dicaffeoylquinic acids, flavonoids, proazulenic sesquiterpene lactone (matricin): anti-inflammatory activity;                                                                                                                                                                                                                                                                              |
| Flowers/inflorescences/flowering tops (infusion)      | Med | Digestive tract disorders                                 | Digestive<br>Abdominal pain<br>Stomachache<br>Astringent,<br>antidiarrheal        | [3,13,15,19,24,25] | WHO<br>Monograph - Herba Millefolii [23] [19,24,25]                                       | E.O. antibacterial activity; flavonoids (apigenin, luteolin): estrogenic activity [25]                                                                                                                                                                                                                                                                                                     |
| Leaves (infusion)                                     |     |                                                           |                                                                                   |                    | WHO<br>Monograph - Herba Millefolii (Anti-inflammatory) [23] [25](Anti-inflammatory) [24] | E.O. (terpinolene, 1,8-cineol, thujone, $\gamma$ -terpinene, borneol, camphor), rutin: antibacterial, antioxidant, and antinociceptive; apigenin 7-O-glucoside, luteolin 7-O-glucoside: anti-inflammatory; quercetin, apigenin, and luteolin antispasmodic; luteolin-7-O-beta-D-glucuronide: coleretic; dihydrodehydrodiconiferyl alcohol, and 9-O-beta-D-glucopyranoside: estrogenic [24] |
| Epigeal part (Whole) (compress or bath with infusion) | Med | Musculoskeletal system disorders and traumas              | Contusions<br>Sprains and dislocations<br>Articular pain and Inflammations        |                    |                                                                                           |                                                                                                                                                                                                                                                                                                                                                                                            |
| Leaves (compress or bath with infusion)               |     |                                                           |                                                                                   |                    |                                                                                           |                                                                                                                                                                                                                                                                                                                                                                                            |
| Flowers/inflorescences/flowering tops (infusion)      | Med | Gynecological disorders, obstetric and puerperal problems | Anti-inflammatory and soothing<br>Rash<br>Menstrual pains<br>Menopausal disorders | [3,13]             | WHO<br>Monograph - Herba Millefolii (Anti-inflammatory) [23] [24,25]                      |                                                                                                                                                                                                                                                                                                                                                                                            |
| Epigeal part (Whole) (wash or bath with infusion)     |     |                                                           |                                                                                   |                    |                                                                                           |                                                                                                                                                                                                                                                                                                                                                                                            |
| Flowers/inflorescences/flowering tops (fumigation)    | Med | Respiratory tract infections                              | Expectorant, decongestant, emollient                                              | [15,24,25]         | WHO<br>Monograph - Herba Millefolii [23]                                                  |                                                                                                                                                                                                                                                                                                                                                                                            |
| Flowers/inflorescences/flowering                      | Med | General condition                                         | Infections<br>Relaxant footbath                                                   |                    | [24,25]                                                                                   |                                                                                                                                                                                                                                                                                                                                                                                            |

|                                                        |                                                            |     |                                                           |                                                                                 |                            |                                                                                                                                                                                                                                                                                                                                    |
|--------------------------------------------------------|------------------------------------------------------------|-----|-----------------------------------------------------------|---------------------------------------------------------------------------------|----------------------------|------------------------------------------------------------------------------------------------------------------------------------------------------------------------------------------------------------------------------------------------------------------------------------------------------------------------------------|
|                                                        | tops (infusion, footbath)                                  |     |                                                           |                                                                                 |                            |                                                                                                                                                                                                                                                                                                                                    |
|                                                        | Flowers/inflorescences/flowering tops (wash with infusion) | Vet | Cattle                                                    | Disinfectant for cattle legs wounds<br>Intestinal disorders                     | [15]                       | WHO Monograph - Herba Millefolii [23]                                                                                                                                                                                                                                                                                              |
|                                                        | Flowers/inflorescences/flowering tops (infusion)           | Vet | Cattle<br>Dogs                                            | Intestinal disorders                                                            |                            | WHO Monograph - Herba Millefolii [23]                                                                                                                                                                                                                                                                                              |
|                                                        | Epigeal part (Whole) (compresses with infusion)            | Med | Skin diseases and traumas                                 | Anti-inflammatory, disinfectant and wound healing                               | [3,26]                     | Antimicrobial [26]                                                                                                                                                                                                                                                                                                                 |
|                                                        | Flowers/inflorescences/flowering tops (infusion)           | Med | Circulatory system disorders                              | Hypotensive                                                                     | [13,26]                    |                                                                                                                                                                                                                                                                                                                                    |
|                                                        | Flowers/inflorescences/flowering tops (infusion)           | Med | Digestive tract disorders                                 | Gastric antispasmodic<br>Digestive Carminative<br>Abdominal pain<br>Stomachache | [3,13,14,15,22,26,208,209] |                                                                                                                                                                                                                                                                                                                                    |
| <i>Achillea moschata</i><br>Wulfen<br>Erba iva, daneda | Epigeal part (Whole) (infusion)                            |     |                                                           |                                                                                 |                            |                                                                                                                                                                                                                                                                                                                                    |
|                                                        | Epigeal part (Whole) (footbath/bath with infusion)         | Med | Musculoskeletal system disorders and traumas              | Inflammations and pain                                                          | [13]                       | Phenolic and caffeic compounds (7-O-glucosyl luteolin, 7-O-β-glucosyl apigenin, 3-O-β-glucosyl-kaempferol, Luteolin, Apigenin, 3-O-β-Rutinosyl-isorhamnetin, 3-O-β-Glucosyl-isorhamnetin 5-O-caffeoylquinic acid, 4,5-dicaffeoylquinic acid): antioxidant activity; E.O. (camphor, 1-8-cineole, bornylacetate): antibacterial [26] |
|                                                        | Flowers/inflorescences/flowering tops (infusion)           | Med | Gynecological disorders, obstetric and puerperal problems | Menstrual pains                                                                 | [13,15,26]                 |                                                                                                                                                                                                                                                                                                                                    |

|                                                             |                                                                                                 |     |                                              |                                                                                                   |                                                     |                                                                                                                                                                                                              |                                                              |
|-------------------------------------------------------------|-------------------------------------------------------------------------------------------------|-----|----------------------------------------------|---------------------------------------------------------------------------------------------------|-----------------------------------------------------|--------------------------------------------------------------------------------------------------------------------------------------------------------------------------------------------------------------|--------------------------------------------------------------|
|                                                             | Epigeal part (Whole) (infusion)                                                                 | Med | Nervous system disorders                     | Sedative hypnotic, promotes sleep                                                                 | [3,15,26]                                           |                                                                                                                                                                                                              |                                                              |
|                                                             | Epigeal part (Whole) (infusion)                                                                 | Med | Respiratory tract infections                 | Cough                                                                                             | [3,15,26]                                           |                                                                                                                                                                                                              |                                                              |
|                                                             | Flowers/inflorescences/flowering tops (infusion)                                                | Med | General condition                            | Anti-inflammatory                                                                                 | [3,15,22,26]                                        |                                                                                                                                                                                                              |                                                              |
|                                                             | Flowers/inflorescences/flowering tops (infusion)                                                | Vet | Cattle                                       | Intestinal problems, bloating                                                                     | [2,3,13,15,26]                                      |                                                                                                                                                                                                              |                                                              |
| <i>Arnica montana</i> L.<br>subsp. <i>montana</i><br>Arnica | Underground organs (roots/bulbs/tubers/rhizomes) (decoction)                                    | Med | Urinary tract disorders                      | Remineralizing<br>Urinary tract depurative                                                        |                                                     | Helenanin (sesquiterpene lactone): analgesic and anti-inflammatory (WHO Monograph - Flos Arnicae [29] [30,33,34])                                                                                            |                                                              |
|                                                             | Flowers/inflorescences/flowering tops (exudate/EtOH extract application)                        | Med | Skin diseases and traumas                    | Anti-inflammatory, disinfectant and wound healing                                                 | [2,13,14,15,22,30]                                  | WHO Monograph - Flos Arnicae [29] [30,36]<br>Helenanin (sesquiterpene lactone): antimicrobial [31]<br>MeOH extract <i>per os</i> (quinic acids, inositol esters, rutin, gallic acid): anti-inflammatory [32] |                                                              |
|                                                             | Leaves (boiled and applied)                                                                     |     |                                              |                                                                                                   |                                                     |                                                                                                                                                                                                              |                                                              |
|                                                             | Flowers/inflorescences/flowering tops (exudate/exudate in ointment or compresses with infusion) | Med | Musculoskeletal system disorders and traumas | Contusions<br>Articular pain and inflammations<br>Rheumatic pain<br>Muscle inflammations and pain | WHO Monograph - Flos Arnicae [29] [2,3,13,14,15,30] | WHO Monograph - Flos Arnicae [29] [30,31,32,36]                                                                                                                                                              | Helenanin and dihydrohelenanin: anti-inflammatory [30,31,36] |
|                                                             | Flowers/inflorescences/flowering tops                                                           | Med | Digestive tract disorders                    | Stomachache<br>Stomach depurative                                                                 | WHO Monograph -                                     | Flavonoids and phenols: antioxidant [30]                                                                                                                                                                     |                                                              |

|                                           | (infusion)                                                                 |     |                                                           |                                                                                                    | Flos Arnicae<br>[29]                                        |                                                       |                                                                                                                          |
|-------------------------------------------|----------------------------------------------------------------------------|-----|-----------------------------------------------------------|----------------------------------------------------------------------------------------------------|-------------------------------------------------------------|-------------------------------------------------------|--------------------------------------------------------------------------------------------------------------------------|
|                                           | Flowers/inflorescences/flowering tops (exudate application)                | Med | General condition                                         | Anti-inflammatory<br>Analgesic<br>Infections                                                       | [15,30]                                                     | WHO Monograph - Flos Arnicae [29] [30,31,33,34,35,36] |                                                                                                                          |
| <i>Artemisia absinthium</i> L. Assenzio   | Flowers/inflorescences/flowering tops (infusion)                           | Med | Digestive tract disorders                                 | Digestive                                                                                          | [2,3,13,14,15,22,205]                                       | [31,37,38] (Opposite effect - [40])                   | Bitter taste due to sesquiterpenes lactones (absinthin, anabsinthin, arthabsin, anabsin): digestive [31,37,39]           |
|                                           | Flowers/inflorescences/flowering tops (infusion)                           | Med | Nervous system disorders                                  | Cephalea due to digestive disorders                                                                | [14]                                                        |                                                       |                                                                                                                          |
|                                           | Epigeal part (Whole) (eaten raw)                                           | Vet | Cattle                                                    | Promotes digestion                                                                                 | [13,14,15]                                                  | [31,37]                                               |                                                                                                                          |
| <i>Artemisia genipi</i> Weber Genépi      | Epigeal part (Whole) (infusion)                                            | Med | Digestive tract disorders                                 | Digestive                                                                                          | [2,3,13,15,18]                                              | [39,41]                                               | Some of the sesquiterpenes lactones (such as santamarine) of génépi may activate hTAS2R46 bitter taste receptors [39,41] |
|                                           | Epigeal part (Whole) (infusion)                                            | Med | Gynecological disorders, obstetric and puerperal problems | Menstrual pains                                                                                    |                                                             |                                                       |                                                                                                                          |
|                                           | Epigeal part (Whole) (infusion)                                            | Med | Respiratory tract infections                              | Colds                                                                                              | [15,18]                                                     | [39,41]                                               |                                                                                                                          |
| <i>Calendula officinalis</i> L. Calendula | Flowers/inflorescences/flowering tops (compresses with infusion, ointment) | Med | Skin diseases and traumas                                 | Anti-inflammatory, disinfectant and wound healing<br>Sunburns, burns, frostbites, redness and rash | WHO Monograph - Flos Calendulae [43] [3,13,14,15,44,47,206] | WHO Monograph - Flos Calendulae [43] [31,44,45,46,47] | Flavonoids (quercetin): antioxidant [45]<br><br>Triterpenoid esters (faradiol-3-O-laurate, faradiol-3-O-palmitate e      |

|                                                   |                                                                              | Emollient, soothing<br>Insect bites |                                                              |                                                            |                                                             |                                                             | faradiol-3-O-myristate):<br>anti-inflammatory.<br>Quercetin: partially<br>inhibits collagen<br>degradation and MMP2<br>activity.<br>Quercetin-3-O-glucoside<br>and rutin stimulate<br>primary fibroblasts.<br>[44] |
|---------------------------------------------------|------------------------------------------------------------------------------|-------------------------------------|--------------------------------------------------------------|------------------------------------------------------------|-------------------------------------------------------------|-------------------------------------------------------------|--------------------------------------------------------------------------------------------------------------------------------------------------------------------------------------------------------------------|
| <i>Carduus nutans</i> L.<br><i>Cardo svizzero</i> | Epigeal part<br>(Whole)<br>(compresses with<br>infusion)                     | Med                                 | Circulator<br>y system<br>disorders                          | Promotes<br>circulation                                    | WHO<br>Monograph -<br>Flos<br>Calendulae<br>[43]<br>[2,15]  | WHO<br>Monograph -<br>Flos<br>Calendulae<br>[43]<br>[46,48] |                                                                                                                                                                                                                    |
|                                                   | Flowers/infloresce<br>nces/flowering<br>tops<br>(infusion)                   | Med                                 | Urinary<br>tract<br>disorders                                | Cystitis and other<br>inflammation of the<br>urinary tract |                                                             |                                                             | Carotenoids or their<br>degradation compounds<br>may promote wound<br>healing more than<br>triterpenes<br>[47]                                                                                                     |
|                                                   | Flowers/infloresce<br>nces/flowering<br>tops<br>(macerated oil,<br>ointment) | Med                                 | Musculosk<br>eletal<br>system<br>disorders<br>and<br>traumas | Contusions<br>Articular pain and<br>inflammations          | WHO<br>Monograph -<br>Flos<br>Calendulae<br>[43]<br>[13,15] | [210]                                                       | Terpenoids and<br>flavonoids: anti-<br>inflammatory and<br>antiedema<br>[46]                                                                                                                                       |
|                                                   | Flowers/infloresce<br>nces/flowering<br>tops                                 | Vet                                 | Alpacas                                                      | Animal skin allergic<br>reactions                          |                                                             |                                                             |                                                                                                                                                                                                                    |
|                                                   | Flowers/infloresce<br>nces/flowering<br>tops<br>(infusion)                   | Med                                 | Urinary<br>tract<br>disorders                                | Depurative                                                 | [211,212]                                                   |                                                             | Synergic activity of<br>different non-polar<br>compounds (i.e. palmitic,<br>oleic, and linoleic acids):<br>antiviral and anti-<br>inflammatory [49]                                                                |
|                                                   | Flowers/infloresce<br>nces/flowering<br>tops<br>(eaten raw)                  | Vet                                 | Cattle                                                       | Galactagogue                                               |                                                             |                                                             |                                                                                                                                                                                                                    |
|                                                   | Flowers/infloresce<br>nces/flowering<br>tops<br>(eaten raw)                  | Vet                                 | Cattle                                                       | Throat depurative                                          |                                                             | [49]                                                        | Flavonoids luteolin and<br>apigenin: anti-<br>inflammatory and<br>antioxidant [211,212]                                                                                                                            |

|                                                                                                    |                                                                       |     |                           |                                                        |                                                               |                                                                                                                                                                                         |
|----------------------------------------------------------------------------------------------------|-----------------------------------------------------------------------|-----|---------------------------|--------------------------------------------------------|---------------------------------------------------------------|-----------------------------------------------------------------------------------------------------------------------------------------------------------------------------------------|
| <i>Carlina acaulis</i> L.<br>subsp. <i>intybus</i><br><i>Carlina bianca</i> ,<br>Pane degli alpini | Flowers/inflorescences/flowering tops<br>(eaten raw)                  | Vet | Cattle                    | Galactagogue                                           |                                                               |                                                                                                                                                                                         |
|                                                                                                    | Flowers/inflorescences/flowering tops<br>(eaten raw)                  | Vet | Cattle                    | Throat depurative                                      |                                                               |                                                                                                                                                                                         |
| <i>Cichorium intybus</i><br>L.<br>Catalogna                                                        | Leaves (infusion)                                                     | Med | Urinary tract disorders   | Depurative                                             | [3,15,56,57,206,213,214]                                      | [56,57]                                                                                                                                                                                 |
| <i>Matricaria chamomilla</i> L.<br>Camomilla                                                       | Flowers/inflorescences/flowering tops<br>(compresses with infusion)   | Med | Ophthalmic ailments       | Ocular anti-inflammatory                               | WHO Monograph – Flos Chamomillae [43]<br>[3,14,15,22,206,215] | [31,67]<br>Apigenin: anti-inflammatory [31,108,109]; ansiolitic and antispasmodic [31,108]<br>Bisabolol: antispasmodic [108]                                                            |
|                                                                                                    | Flowers/inflorescences/flowering tops<br>(infusion)                   | Med | Digestive tract disorders | Abdominal pain<br>Stomachache<br>Gastric antispasmodic | [3,15,67,109,111,205,206]                                     | WHO Monograph – Flos Chamomillae [43]<br>[31,108,109,110]<br>Bisabolol, chamazulene: antibacterial and antifungal [31]; Anti-inflammatory (WHO Monograph – Flos Chamomillae [43]; [31]) |
|                                                                                                    | Flowers/inflorescences/flowering tops<br>(infusion)                   | Med | Nervous system disorders  | Sedative hypnotic, promotes sleep                      | [3,13,14,15,31,109,111,112,205,206]                           | WHO Monograph – Flos Chamomillae [43]<br>[31,108,109,111,112]<br>Matricin: anti-inflammatory and spasmolytic (WHO Monograph – Flos Chamomillae [43])                                    |
|                                                                                                    | Flowers/inflorescences/flowering tops<br>(bath/washing with infusion) | Med | General condition         | Emollient, soothing                                    | [15]                                                          | WHO Monograph – Flos Chamomillae [43]<br>[31]<br>Flavonoids (apigenina and luteolin): anti-inflammatory (WHO Monograph – Flos Chamomillae [43]; ansiolitic [111])                       |
|                                                                                                    |                                                                       |     |                           |                                                        |                                                               |                                                                                                                                                                                         |



|                                                           |                                                                     |     |                                 |                                                   |          |                                                         | Apigenin-7-O-Glucoside<br>found in aqueous extracts<br>[216]                                                                                                               |
|-----------------------------------------------------------|---------------------------------------------------------------------|-----|---------------------------------|---------------------------------------------------|----------|---------------------------------------------------------|----------------------------------------------------------------------------------------------------------------------------------------------------------------------------|
|                                                           | Flowers/inflorescences/flowering tops<br>(compresses with infusion) | Vet | All                             | Ocular anti-inflammatory,<br>conjunctivitis       | [168]    | [31,67]                                                 |                                                                                                                                                                            |
|                                                           | Flowers/inflorescences/flowering tops (infusion)                    | Med | Circulatory system disorders    | Blood depurative                                  |          | [157]                                                   | Silymarin and silybin: anti hepatotoxic (WHO Monograph - Fructus Silybi Mariae [23]; [31,157,158]); anti-inflammatory and antioxidant.                                     |
| <i>Silybum marianum</i><br>(L.) Gaertn.<br>Cardo mariano  | Flowers/inflorescences/flowering tops (infusion)                    | Med | Digestive tract disorders       | Liver depurative                                  | [22,157] | WHO Monograph – Fructus Silybi Mariae [23] [31,157,158] | (WHO Monograph - Fructus Silybi Mariae [23]; [31])<br><br>Silybin detected in inflorescences [217]                                                                         |
|                                                           | Flowers/inflorescences/flowering tops<br>(syrup)                    | Med | Oropharyngeal cavity affections | Sorethroat                                        |          | [163] (Anti-inflammatory)<br>[162]                      | Bitter Sesquiterpene glucosides 14-O-beta-D-glucosyl-11,13-dihydro-taraxinic acid and 14-O-beta-D-glucosyl-taraxinic acid (from MeOH extract): anti-inflammatory [166,218] |
| <i>Taraxacum</i> spp.<br>Tarassaco<br>Zicòria/dent de can | Flowers/inflorescences/flowering tops (applied raw)                 |     |                                 | Acne, pimples, foruncles, skin abscesses          |          |                                                         |                                                                                                                                                                            |
|                                                           | Latex or sap (latex raw)                                            | Med | Skin diseases and traumas       | Anti-inflammatory, disinfectant and wound healing | [15,219] | [163] (Anti-inflammatory)                               |                                                                                                                                                                            |
|                                                           | Epigeal part (Whole)<br>(compresses with infusion)                  |     |                                 | Insect bites                                      |          |                                                         | Triterpene uvaol (from dried flowers): anti-inflammatory [168]                                                                                                             |

|                                                                                                         |     |                              |                                                                                                               |                                   |                   |                                                                                                                                    |
|---------------------------------------------------------------------------------------------------------|-----|------------------------------|---------------------------------------------------------------------------------------------------------------|-----------------------------------|-------------------|------------------------------------------------------------------------------------------------------------------------------------|
| Underground organs (roots/bulbs/tubers/rhizomes) (eaten)                                                | Med | Circulatory system disorders | Blood depurative                                                                                              | [2,19,165]                        |                   | Sesquiterpene lactones and phenylpropanoids: anti-inflammatory. Terpenoids and bitter lactones: could be active on the liver [163] |
| Flowers/inflorescences/flowering tops (macerated in alcohol, eaten raw sometimes with leaves, infusion) | Med | Digestive tract disorders    | Gastric antispasmodic<br>Digestive<br>Liver depurative                                                        | [13,14,15,22,164,165,205,206,220] | [163,164,165]     |                                                                                                                                    |
| Epigeal part (Whole) (syrup)                                                                            |     |                              |                                                                                                               |                                   |                   |                                                                                                                                    |
| Flowers/inflorescences/flowering tops (infusion)                                                        |     |                              |                                                                                                               |                                   |                   |                                                                                                                                    |
| Leaves (infusion or decoction)                                                                          |     |                              | Kidney stones<br>Cystitis and other inflammation of the urinary tract<br>Urinary tract depurative<br>Diuretic |                                   |                   |                                                                                                                                    |
| Epigeal part (Whole) (infusion)                                                                         | Med | Urinary tract disorders      |                                                                                                               | [2,13,19,163,165,206,219]         | [163,165,166,167] |                                                                                                                                    |
| Underground organs (roots/bulbs/tubers/rhizomes) (infusion or decoction)                                |     |                              |                                                                                                               |                                   |                   |                                                                                                                                    |
| Flowers/inflorescences/flowering tops (syrup, infusion)                                                 | Med | Respiratory tract infections | Expectorant, decongestant, emollient<br>Flu and flu syndromes<br>Sorethroat and hoarseness<br>Cough           | [13,15,163,165]                   |                   |                                                                                                                                    |

|                                              |                                                     |     |                                              |                                                                                                                                     |                |                                                                       |                                                                                                      |
|----------------------------------------------|-----------------------------------------------------|-----|----------------------------------------------|-------------------------------------------------------------------------------------------------------------------------------------|----------------|-----------------------------------------------------------------------|------------------------------------------------------------------------------------------------------|
|                                              | Flowers/inflorescences/flowering tops (syrup)       | Med | General condition                            | Anti-inflammatory                                                                                                                   | [3,15,163,165] | [163,165,168]                                                         |                                                                                                      |
|                                              | Flowers/inflorescences/flowering tops (applied raw) | Vet | Other animals                                | Anti-inflammatory for infected wounds                                                                                               | [219]          | [163,168]                                                             | (Anti-inflammatory)                                                                                  |
| <b>Betulaceae</b>                            |                                                     |     |                                              |                                                                                                                                     |                |                                                                       |                                                                                                      |
| <i>Betula pendula</i><br>Roth<br>Pendula     | Leaves (infusion)                                   | Med | Circulatory system disorders                 | Hypocholesterolemia                                                                                                                 | [42]           |                                                                       | Acid betulinic: anti-inflammatory and diuretic [42]                                                  |
|                                              | Leaves (infusion)                                   | Med | Urinary tract disorders                      | Urinary tract depurative<br>Diuretic                                                                                                | [3,15,42,221]  | [42]                                                                  | Poliphenols (catechins, p-coumaric acid, myricetin, quercetin, and kaempferol): antioxidant [221]    |
|                                              | Leaves (infusion)                                   |     |                                              |                                                                                                                                     |                |                                                                       |                                                                                                      |
|                                              | Latex or sap (drunk raw)                            | Med | General condition                            | Tonic and corroborant                                                                                                               | [42]           |                                                                       |                                                                                                      |
| <b>Brassicaceae</b>                          |                                                     |     |                                              |                                                                                                                                     |                |                                                                       |                                                                                                      |
| <i>Brassica oleracea</i><br>L.<br>Verza      | Leaves (applied as a poultice)                      | Med | Musculoskeletal system disorders and traumas | Arthrosis<br>Contusions<br>Sprains and dislocations<br>Rheumatic pain<br>Inflammations and pain<br>Articular pain and inflammations | [3,205,206]    |                                                                       |                                                                                                      |
|                                              | Leaves (applied as a poultice)                      | Med | Respiratory tract infections                 | Improves breathing                                                                                                                  |                |                                                                       |                                                                                                      |
| <b>Caprifoliaceae</b>                        |                                                     |     |                                              |                                                                                                                                     |                |                                                                       |                                                                                                      |
| <i>Valeriana officinalis</i> L.<br>Valeriana | Epigeal part (Whole) (infusion)                     | Med | Nervous system disorders                     | Sedative hypnotic, promotes sleep                                                                                                   | [15,195,206]   | [189,190,191,192,193,194,195]<br>([196] no statistically significant) | Valepotriates, valerenic acid and derivatives, E.O.: sedative [222]<br>Valerenic acid and E.O. [194] |

difference to placebo)  
Sesquiterpenes, valeric acid  
[168,195]

### Cupressaceae

|                                                            |                                                                    |     |                              |                                               |                                 |            |                                                                                                       |
|------------------------------------------------------------|--------------------------------------------------------------------|-----|------------------------------|-----------------------------------------------|---------------------------------|------------|-------------------------------------------------------------------------------------------------------|
| <i>Juniperus communis</i> L.<br>Ginepro<br>Pedüli de càvar | Fruits/infructescences/accessory fruits (infusion)                 | Med | Digestive tract disorders    | Digestive                                     | [2,3,14,15,18,19,77,78,223,224] | [77,78,79] | E.O.: digestive [79]                                                                                  |
|                                                            | Epigeal part (Whole) (infusion)                                    |     |                              |                                               |                                 |            |                                                                                                       |
|                                                            | Fruits/infructescences/accessory fruits (infusion)                 | Med | Nervous system disorders     | Sedative hypnotic, promotes sleep             | [225]                           |            | E.O. ( $\alpha$ -pinene 20-50%, sabinene <20%, $\beta$ -pinene 1-12%, $\beta$ -myrcene 1-30%) [77,78] |
|                                                            | Fruits/infructescences/accessory fruits (infusion, salve/ointment) | Med | Respiratory tract infections | Colds<br>Expectorant, decongestant, emollient | [3,13,14,15,78,224]             |            |                                                                                                       |

### Equisetaceae

|                                                                            |                                                 |     |                                                           |                                                           |                   |                     |                                                                                                                                                             |
|----------------------------------------------------------------------------|-------------------------------------------------|-----|-----------------------------------------------------------|-----------------------------------------------------------|-------------------|---------------------|-------------------------------------------------------------------------------------------------------------------------------------------------------------|
| <i>Equisetum arvense</i> L.<br>Erba cavallina,<br>equiseto, coda cavallina | Herbaceous stems/scapes (infusion)              | Med | Urinary tract disorders                                   | Diuretic<br>Depurative<br>Kidney stones<br>Remineralizing | [2,3,13,14,15,62] | [60,61,62]          | High concentrations of flavonoids, phenolic compound, and mineral salts: mild diuretic action; silicon salts: may indicate remineralisation properties [62] |
|                                                                            | Herbaceous stems/scapes (applied as a poultice) | Med | Musculoskeletal system disorders and traumas              | Contusions                                                | [3]               | [60,61,63,64,65,66] | Kynurenic acid: anti-inflammatory and analgesic [64,66]                                                                                                     |
|                                                                            | Herbaceous stems/scapes (infusion)              | Med | Gynecological disorders, obstetric and puerperal problems | Menstrual pains                                           |                   |                     | B-sitosterol, campesterol, isofucosterol: anti-inflammatory steroidal effects                                                                               |

|                                                              |                                                     |     |                              |                                      |                                                                            |                                                                          |                                                                                                                                                                               |
|--------------------------------------------------------------|-----------------------------------------------------|-----|------------------------------|--------------------------------------|----------------------------------------------------------------------------|--------------------------------------------------------------------------|-------------------------------------------------------------------------------------------------------------------------------------------------------------------------------|
|                                                              | Herbaceous stems/scapes (infusion)                  | Med | General condition            | Analgesic                            |                                                                            | [61,63,64,65,66]                                                         | [65]                                                                                                                                                                          |
| <b>Ericaceae</b>                                             |                                                     |     |                              |                                      |                                                                            |                                                                          |                                                                                                                                                                               |
| <i>Vaccinium myrtillus</i> L.<br>Mirtillo nero               | Fruits/infructescences/accessory fruits (eaten raw) | Med | Ophthalmic ailments          | Promotes eyesight and eyes health    | WHO Monograph - Fructus Myrtilli [146] [3,13,14,15,187] (refuted by [185]) | WHO Monograph - Fructus Myrtilli [146] [177,178,179,180,181,182,183,184] | Phenolic compounds (in particular anthocyanins): improve ocular microcirculation (WHO Monograph - Fructus Myrtilli) [146], [183]); therapeutic properties (nonspecific) [187] |
|                                                              | Fruits/infructescences/accessory fruits (eaten raw) | Med | Circulatory system disorders | Promotes circulation                 | WHO Monograph Fructus Myrtilli [146] [3,13,15,187]                         | WHO Monograph - Fructus Myrtilli [146] [178,183,186]                     | Cyanidin, delphinidin, and malvidin: protect from retinal damage [179,181]                                                                                                    |
|                                                              | Fruits/infructescences/accessory fruits (eaten raw) | Med | Urinary tract disorders      | Promotes urinary tract health        | WHO Monograph - Fructus Myrtilli [146] [3,187,204]                         | [187]                                                                    |                                                                                                                                                                               |
| <i>Vaccinium vitis-idaea</i> L.<br>Mirtillo rosso<br>Gäudi   | Fruits/infructescences/accessory fruits (eaten raw) | Med | Ophthalmic ailments          | Promotes eyesight and eyes health    |                                                                            | [180,181]                                                                | Compounds active on urinary tract: high molecular weight proanthocyanidins (condensed tannins) [183]; phenolic compounds [226]; arbutin and derivatives, tannins [187]        |
|                                                              | Fruits/infructescences/accessory fruits (eaten raw) | Med | Circulatory system disorders | Circulation, veins and blood vessels |                                                                            |                                                                          |                                                                                                                                                                               |
|                                                              | Fruits/infructescences/accessory fruits (eaten raw) | Med | Urinary tract disorders      | Promotes urinary tract health        | [3,13,187,204,226]                                                         | [183,187,188]                                                            |                                                                                                                                                                               |
| <b>Gentianaceae</b>                                          |                                                     |     |                              |                                      |                                                                            |                                                                          |                                                                                                                                                                               |
| <i>Gentiana lutea</i> L.<br>subsp. <i>lutea</i><br>Risanzana | Underground organs (roots/bulbs/tuber)              | Med | Circulatory system disorders | Blood depurative                     |                                                                            |                                                                          | Bitter monoterpenes (gentiopicroside, swertiamarin, sweroside e                                                                                                               |

|                                               |                                                                                      |     |                                                              |                                                                                                       |                                                                                         |                                                                               |                                                                                                                         |
|-----------------------------------------------|--------------------------------------------------------------------------------------|-----|--------------------------------------------------------------|-------------------------------------------------------------------------------------------------------|-----------------------------------------------------------------------------------------|-------------------------------------------------------------------------------|-------------------------------------------------------------------------------------------------------------------------|
|                                               | s/rhizomes)<br>(decoction)                                                           |     |                                                              |                                                                                                       |                                                                                         |                                                                               | amarogentin): digestive<br>and eupeptic<br>WHO Monograph - Radix<br>Gentianae Scabrae [29])                             |
|                                               | Underground<br>organs<br>(roots/bulbs/tuber<br>s/rhizomes)<br>(decoction,<br>grappa) | Med | Digestive<br>tract<br>disorders                              | Digestive<br>Stomach anti-<br>inflammatory<br>Liver anti-<br>inflammatory<br>Stomachache<br>Vermifuge | WHO<br>Monograph -<br>Radix<br>Gentianae<br>Luinfusione<br>[29]<br>[2,14,15,22,2<br>27] | WHO<br>Monograph -<br>Radix<br>Gentianae<br>Luinfusione<br>[29]<br>[31,37,71] | Gentiopicroside,<br>amarogentin:<br>gastroprotective<br>[71,227]                                                        |
|                                               | Underground<br>organs<br>(roots/bulbs/tuber<br>s/rhizomes)<br>(decoction)            | Med | Urinary<br>tract<br>disorders                                | Urinary tract<br>depurative                                                                           | [15,227]                                                                                |                                                                               |                                                                                                                         |
|                                               | Underground<br>organs<br>(roots/bulbs/tuber<br>s/rhizomes)<br>(macerated oil)        | Med | Musculosk<br>eletal<br>system<br>disorders<br>and<br>traumas | Contusions<br>Inflammations and<br>pain                                                               |                                                                                         |                                                                               |                                                                                                                         |
|                                               | Flowers/infloresce<br>nces/flowering<br>tops<br>(decoction)                          | Med | General<br>condition                                         | Immunomodulant<br>Tonic and<br>corroborant                                                            | WHO<br>Monograph -<br>Radix<br>Gentianae<br>Luinfusione<br>[29]<br>[15]                 |                                                                               |                                                                                                                         |
|                                               | Underground<br>organs<br>(roots/bulbs/tuber<br>s/rhizomes)<br>(decoction)            | Vet | Cattle                                                       | Carminative                                                                                           |                                                                                         |                                                                               |                                                                                                                         |
| <b>Hypericaceae</b>                           |                                                                                      |     |                                                              |                                                                                                       |                                                                                         |                                                                               |                                                                                                                         |
| <i>Hypericum<br/>perforatum</i> L.<br>Iperico | Flowers/infloresce<br>nces/flowering<br>tops<br>(macerated oil)                      | Med | Skin<br>diseases<br>and<br>traumas                           | Sunburns, burns,<br>frostbites, redness<br>and rash<br>Anti-inflammatory,<br>disinfectant and         | WHO<br>Monograph -<br>Herba Hyperici<br>[23]<br>Guarrera 2005                           | WHO<br>Monograph -<br>Herba<br>Hyperici [23]<br>[31,72]                       | Hyperforin, hypericin, and<br>pseudohypericin:<br>antimicrobial;<br>hyperforin and flavonoids:<br>antioxidant and anti- |

|                                                                                             |                                        |                                                          |                                                                                                                         |                                                              |                                                                      |                                                                                                                          |
|---------------------------------------------------------------------------------------------|----------------------------------------|----------------------------------------------------------|-------------------------------------------------------------------------------------------------------------------------|--------------------------------------------------------------|----------------------------------------------------------------------|--------------------------------------------------------------------------------------------------------------------------|
|                                                                                             |                                        |                                                          |                                                                                                                         | wound healing<br>Psoriasis<br>Insect bites                   | [2,3,13,14,15,<br>19,22,72,205,<br>206]                              | inflammatory<br>[72,73]<br>hyperforin and hypericin:<br>antidepressant<br>(WHO Monograph - Herba<br>Hyperici [23], [31]) |
| Epigeal part<br>(Whole)<br>(macerated oil<br>rubbed)                                        | Med                                    | Digestive<br>tract<br>disorders                          | Abdominal pain                                                                                                          |                                                              |                                                                      |                                                                                                                          |
| Epigeal part<br>(Whole)<br>(infusion)                                                       | Med                                    | Urinary<br>tract<br>disorders                            | Urinary tract<br>depurative                                                                                             |                                                              | WHO<br>Monograph –<br>Herba Hyperici<br>[23]<br>[72]                 |                                                                                                                          |
| Flowers/inflorescences/flowering<br>tops<br>(macerated oil,<br>compresses with<br>infusion) | Med                                    | Musculoskeletal<br>system<br>disorders<br>and<br>traumas | Contusions<br>Sprains and<br>dislocations<br>Articular pain and<br>inflammations<br>Muscle<br>inflammations and<br>pain | [2,3,13,14,15,<br>22,72]                                     | [72,73]                                                              |                                                                                                                          |
| Epigeal part<br>(Whole)<br>(macerated oil,<br>infusion)                                     | Med                                    | Nervous<br>system<br>disorders                           | Lumbago and<br>neuralgia<br>Antidepressant<br>Sedative hypnotic,<br>promotes sleep                                      | WHO<br>Monograph –<br>Herba Hyperici<br>[23]<br>[3,13,15,72] | WHO<br>Monograph –<br>Herba<br>Hyperici [23]<br>[31,73,74,75<br>,76] |                                                                                                                          |
| Epigeal part<br>(Whole)<br>(macerated oil)                                                  | Med                                    | General<br>condition                                     | Lymphatic system<br>anti-inflammatory                                                                                   |                                                              |                                                                      |                                                                                                                          |
| <b>Iridaceae</b>                                                                            |                                        |                                                          |                                                                                                                         |                                                              |                                                                      |                                                                                                                          |
| <i>Crocus vernus</i> (L.)<br>Hill<br>Croco, bucaneve                                        | Epigeal part<br>(Whole)<br>(eaten raw) | Vet                                                      | Cats                                                                                                                    | Observed a thrill-<br>like effect when<br>ingested           |                                                                      |                                                                                                                          |
| <b>Lamiaceae</b>                                                                            |                                        |                                                          |                                                                                                                         |                                                              |                                                                      |                                                                                                                          |
| <i>Lamium album</i> L.<br>Ortica bianca                                                     | Leaves (infusion)                      | Med                                                      | Urinary<br>tract<br>disorders                                                                                           | Diuretic                                                     | [13,80]                                                              | [80,81]                                                                                                                  |

|                                                |                                                               |     |                                                           |                                                   |                                                           |                                                        |                                                                                                                                                                                                  |
|------------------------------------------------|---------------------------------------------------------------|-----|-----------------------------------------------------------|---------------------------------------------------|-----------------------------------------------------------|--------------------------------------------------------|--------------------------------------------------------------------------------------------------------------------------------------------------------------------------------------------------|
|                                                | Flowers/inflorescences/flowering tops (macerated oil)         | Med | Afflictions of the ear                                    | Otitis                                            | [3]                                                       |                                                        |                                                                                                                                                                                                  |
| <i>Lavandula angustifolia</i> Mill.<br>Lavanda | Leaves (compresses with infusion)                             | Med | Skin diseases and traumas                                 | Anti-inflammatory, disinfectant and wound healing | WHO Monograph - Flos and Aetheroleum Lavandulae [29] [15] | WHO Monograph - Aetheroleum Lavandulae [29] [82,84,85] | E.O.: anti-inflammatory (WHO Monograph - Flos Lavandulae [29]); wound healing ([228], [229]- Flowers, [82]- Leaves); sedative (WHO Monograph - Flos Lavandulae [29]; particularly linalool [31]) |
|                                                | Flowers/inflorescences/flowering tops (infusion)              | Med | Nervous system disorders                                  | Sedative hypnotic, promotes sleep                 | [3,15,206]                                                | WHO Monograph - Flos Lavandulae [29] [31,86]           |                                                                                                                                                                                                  |
|                                                | Flowers/inflorescences/flowering tops (salve/ointment)        | Med | General condition                                         | Anti-inflammatory                                 |                                                           | [83,84]                                                |                                                                                                                                                                                                  |
|                                                |                                                               |     |                                                           |                                                   |                                                           |                                                        |                                                                                                                                                                                                  |
| <i>Melissa officinalis</i> L.<br>Melissa       | Flowers/inflorescences/flowering tops (applied as a poultice) | Med | Gynecological disorders, obstetric and puerperal problems | Menstrual pains                                   | WHO Monograph - Folium Melissa [23] [230]                 | [113,114]                                              |                                                                                                                                                                                                  |
| <i>Mentha longifolia</i> (L.) Huds.<br>Menta   | Leaves (infusion)                                             | Med | General condition                                         | Tonic and corroborant                             |                                                           |                                                        |                                                                                                                                                                                                  |
| <i>Mentha x piperita</i> L.<br>Menta piperita  | Leaves (gargles/washings with infusion)                       | Med | General condition                                         | Anti-inflammatory                                 | [115]                                                     | [115,116,117]                                          | E.O. (menthol 30,69%, menthone 14,51%, and menthyl acetate 12,86%): anti-inflammatory [116]                                                                                                      |
| <i>Nepeta cataria</i> L.<br>Erba gatta         | Epigeal part (Whole) (eaten raw)                              | Vet | Cats                                                      | Given to the kittens by the mother                |                                                           |                                                        |                                                                                                                                                                                                  |



|                                               |                                                          |     |                                 |                    |                             |                                                                                                                   |                                                                                                                                                                                                                                                                                                                                                                                                                                                                                                                           |
|-----------------------------------------------|----------------------------------------------------------|-----|---------------------------------|--------------------|-----------------------------|-------------------------------------------------------------------------------------------------------------------|---------------------------------------------------------------------------------------------------------------------------------------------------------------------------------------------------------------------------------------------------------------------------------------------------------------------------------------------------------------------------------------------------------------------------------------------------------------------------------------------------------------------------|
|                                               | Epigeal part<br>(Whole)<br>(infusion)                    | Med | Digestive<br>tract<br>disorders | Promotes digestion | [2,15,121,206,<br>231]      |                                                                                                                   | Carvacrol: anti-<br>inflammatory<br>[118,119]                                                                                                                                                                                                                                                                                                                                                                                                                                                                             |
| <i>Origanum vulgare</i><br>L.<br>Origano      | Epigeal part<br>(Whole)<br>(compresses with<br>infusion) | Med | Ophthalmi<br>c ailments         | Conjunctivitis     |                             | [118,119,12<br>0,121]                                                                                             | High carvacrol E.O.: anti-<br>inflammatory; E.O.:<br>antimicrobial against<br><i>Pseudomonas aeruginosa</i> ,<br><i>Staphylococcus aureus</i> ,<br>and <i>Escherichia coli</i> (often<br>found in ocular infections<br>bacterial profiles [232])<br>[120]                                                                                                                                                                                                                                                                 |
| <i>Rosmarinus officinalis</i> L.<br>Rosmarino | Epigeal part<br>(Whole)<br>(infusion)                    | Med | Digestive<br>tract<br>disorders | Liver depurative   | [141]                       | WHO<br>Monograph<br>Aetheroleum<br>Rosmarini<br>and Folium<br>Rosmarini<br>[146]<br><br>[141,142,14<br>3,144,145] | E.O. ( $\alpha$ -pinene<br>18–26%, camphene 8–<br>12%, $\beta$ -pinene 2.0–6.0%,<br>$\beta$ -myrcene 1.5–5.0%,<br>limonene 2.5–5.0%):<br>(WHO Monograph<br>Aetheroleum Rosmarini<br>and Folium Rosmarini<br>[146])<br><br>E.O. (1,8-cineole 43.77%,<br>camphor 12.53%, and $\alpha$ -<br>pinene 11.51%):<br>antioxidant and<br>hepatoprotective<br>[142]<br><br>In the aqueous extract<br>with antioxidant and<br>hepatoprotective<br>properties catechin,<br>coumarin, cinnamic acid,<br>and rutin are detected<br>[144] |
| <i>Salvia officinalis</i> L.<br>Salvia        | Leaves<br>(applied raw)                                  | Med | Oropharyn<br>geal               | Gingivitis         | [2,3,14,15,15<br>0,207,231] | [149,150]                                                                                                         | Flavonoidic fraction,<br>rosmarinic acid, manool,                                                                                                                                                                                                                                                                                                                                                                                                                                                                         |

|                            |                                                  |     |                                                |                                         |                       |               |                                                                                                                                                                                   |
|----------------------------|--------------------------------------------------|-----|------------------------------------------------|-----------------------------------------|-----------------------|---------------|-----------------------------------------------------------------------------------------------------------------------------------------------------------------------------------|
|                            | Leaves (infusion)                                | Med | cavity affections<br>Digestive tract disorders | Depurative and abdominal bloating       | [150,151,152]         | [150]         | carnosol, and ursolic acid: anti-inflammatory [152]                                                                                                                               |
|                            | Leaves (infusion)                                | Med | Urinary tract disorders                        | Depurative                              | [15]                  |               | E.O. (1,8-cineol, thujone, and camphor), non-volatile compounds in MeOH extract: antimicrobial and antifungal (i.e. for oral cavity affections) and anti-inflammatory ([150,231]) |
|                            | Leaves (compresses with infusion)                | Med | Musculoskeletal system disorders and traumas   | Anti-inflammatory for pains and sprains | [152,231]             | [152]         |                                                                                                                                                                                   |
|                            | Leaves (infusion)                                | Med | Respiratory tract infections                   | Colds                                   | [3,15,150,207,231]    |               | Ursolic acid and other diterpenes: anti-inflammatory [150]                                                                                                                        |
|                            | Leaves (washings with infusion)                  | Med | General condition                              | Anti-inflammatory                       | [150,231]             | [150,151,152] | MeOH extract with high contents of rosmarinic, ursolic, caffeic, and oleanolic acids; borneol: anti-inflammatory [151]                                                            |
| <i>Thymus</i> spp.<br>Timo | Epigeal part (Whole) (infusion)                  | Med | Other                                          | Depurative                              |                       |               |                                                                                                                                                                                   |
|                            | Epigeal part (Whole) (infusion)                  | Med | Circulatory system disorders                   | Blood depurative                        | [199,204]             | [144]         | Phenolic compounds, carvacrol, thymol, and others (high variability): antibacterial and antioxidant [170,234,202]                                                                 |
|                            | Flowers/inflorescences/flowering tops (infusion) | Med | Digestive tract disorders                      | Emollient, stomachache                  | [170,171,204,207,199] |               | E.O. and thymol: antibacterial [171]                                                                                                                                              |
|                            | Epigeal part (Whole) (infusion)                  |     |                                                |                                         |                       |               |                                                                                                                                                                                   |

|                                       |                                                       |     |                                                           |                                                                                  |                                                         |                                                                           |
|---------------------------------------|-------------------------------------------------------|-----|-----------------------------------------------------------|----------------------------------------------------------------------------------|---------------------------------------------------------|---------------------------------------------------------------------------|
|                                       | Epigeal part (Whole) (infusion)                       | Med | Urinary tract disorders                                   | Diuretic                                                                         | [15,18,170] ([199] traditionally used as anti-diuretic) |                                                                           |
|                                       | Epigeal part (Whole) (infusion)                       | Med | Nervous system disorders                                  | Relaxant                                                                         | [3,170,171]                                             |                                                                           |
|                                       | Flowers/inflorescences/flowering tops (infusion)      | Med | Respiratory tract infections                              | Balsamic Cough<br>Colds and flu symptoms<br>Expectorant, decongestant, emollient | [2,13,14,15,18,19,170,171,199,204,206]                  | [169,170,171,172]                                                         |
|                                       | Leaves (infusion)                                     |     |                                                           |                                                                                  |                                                         |                                                                           |
|                                       | Epigeal part (Whole) (infusion)                       |     |                                                           |                                                                                  |                                                         |                                                                           |
|                                       | Epigeal part (Whole) (salve/ointment)                 | Med | General condition                                         | Anti-inflammatory                                                                | [170]                                                   | ([170] antioxidant) [171]                                                 |
| <b>Lauraceae</b>                      |                                                       |     |                                                           |                                                                                  |                                                         |                                                                           |
| <i>Laurus nobilis</i> L.<br>Alloro    | Fruits/infructescences/accessory fruits (infusion)    | Med | Digestive tract disorders                                 | Antiacid, gastritis, acid reflux<br>Carminative<br>Abdominal pain                | [3,15,31,89,90,206,235,236]                             | [89,90,91]<br>1.8 cineol and terpinene: gastroprotective activity [89,90] |
|                                       | Leaves (infusion)                                     |     | Gynecological disorders, obstetric and puerperal problems | Menstrual pains                                                                  | [92,93]                                                 | [92,93]<br>E.O.: anti-inflammatory and analgesic [92,93]                  |
| <b>Linaceae</b>                       |                                                       |     |                                                           |                                                                                  |                                                         |                                                                           |
| <i>Linum usitatissimum</i> L.<br>Lino | Seeds (boiled or left in water overnight, then drunk) | Med | Digestive tract disorders                                 | Laxative, intestinal motility                                                    | [2,3,13,15,96]                                          | [94,95,96]<br>Oil and mucilages: laxative [95]                            |

|                                     |                                                                     |     |                                                              |                                                                                            |                                             |                                   |                                                                                                                                                                                       |
|-------------------------------------|---------------------------------------------------------------------|-----|--------------------------------------------------------------|--------------------------------------------------------------------------------------------|---------------------------------------------|-----------------------------------|---------------------------------------------------------------------------------------------------------------------------------------------------------------------------------------|
|                                     | Epigeal part<br>(Whole)<br>(boiled and<br>applied as a<br>poultice) | Med | Respirator<br>y tract<br>infections                          | Expectorant,<br>decongestant,<br>emollient                                                 | [2,3,13,14,15,<br>18,206]                   | [97]                              |                                                                                                                                                                                       |
| <b>Malvaceae</b>                    |                                                                     |     |                                                              |                                                                                            |                                             |                                   |                                                                                                                                                                                       |
|                                     | Leaves<br>(gargles with<br>infusion)                                | Med | Oropharyn<br>geal<br>cavity<br>affections                    | Oral cavity<br>inflammation<br>Toothache<br>Gingivitis                                     | [3,14,100,205<br>,206,237,238]              | [98,99,100,1<br>01]               |                                                                                                                                                                                       |
|                                     | Leaves<br>(compresses with<br>infusion)                             | Med | Skin<br>diseases<br>and<br>traumas                           | Anti-inflammatory<br>Emollient<br>Regenerative                                             | [2,3,15,22,10<br>0,205,206,207<br>,237,238] | [100,101,10<br>2,103,104,1<br>05] |                                                                                                                                                                                       |
|                                     | Leaves<br>(compresses with<br>leaves)                               | Med | Ophthalmi<br>c ailments                                      | Anti-inflammatory,<br>Eye irritations                                                      | [3,100]                                     | [100,101]                         | Anti-inflammatory<br>activity: flavonoids and<br>mucilages<br>[100,238];<br>polysaccharide of<br>mucilaginous complex<br>[237];<br>polyphenols [98];<br>Malvidin-3-glucoside<br>[105] |
|                                     | Leaves<br>(bath/washing<br>with infusion)                           | Med | Early<br>infancy<br>ailments                                 | Soothing, anti-<br>inflammatory for<br>diaper rash                                         | [14,100,237]                                | [100,101]                         |                                                                                                                                                                                       |
| <i>Malva sylvestris</i> L.<br>Malva | Leaves (infusion,<br>washing with<br>infusion)                      | Med | Other                                                        | Anti-inflammatory,<br>refreshing,<br>allergies, relaxant<br>footbath                       | [3,100,237,23<br>8]                         | [100,101]                         |                                                                                                                                                                                       |
|                                     | Leaves (infusion)                                                   | Med | Digestive<br>tract<br>disorders                              | Stomachache,<br>Abdominal pain,<br>Intestinal anti-<br>inflammatory,<br>promotes digestion | [2,14,15,22,1<br>00,205,237,23<br>8]        |                                   | Phenolic compounds:<br>protect kidney function<br>[106]                                                                                                                               |
|                                     | Leaves (infusion)                                                   | Med | Urinary<br>tract<br>disorders                                | Depurative                                                                                 | [2,15,100]                                  | [106,107]                         |                                                                                                                                                                                       |
|                                     | Leaves<br>(compresses with<br>infusion)                             | Med | Musculosk<br>eletal<br>system<br>disorders<br>and<br>traumas | Anti-inflammatory<br>for sprains, tired<br>legs                                            | [3,100]                                     |                                   |                                                                                                                                                                                       |

|                                                                   |                                                            |     |                                                                              |                                              |                                             |           |                                                                                                                                        |
|-------------------------------------------------------------------|------------------------------------------------------------|-----|------------------------------------------------------------------------------|----------------------------------------------|---------------------------------------------|-----------|----------------------------------------------------------------------------------------------------------------------------------------|
|                                                                   | Leaves<br>(bath/washing<br>with infusion)                  | Med | Gynecolog<br>ical<br>disorders,<br>obstetric<br>and<br>puerperal<br>problems | Anti-inflammatory,<br>facilitates childbirth | [3,15,100,206<br>]                          | [101]     |                                                                                                                                        |
|                                                                   | Leaves<br>(bath)                                           | Med | Nervous<br>system<br>disorders                                               | Relaxant, sedative                           | [100]                                       |           |                                                                                                                                        |
|                                                                   | Leaves (infusion)                                          | Med | Respirator<br>y tract<br>infections                                          | Colds                                        | [15,100,206,2<br>38]                        |           |                                                                                                                                        |
|                                                                   | Leaves<br>(compresses,<br>Bath/washing with<br>infusion)   | Med | General<br>condition                                                         | Anti-inflammatory,<br>soothing               | [3,100,205,23<br>7,238]                     | [100,101] |                                                                                                                                        |
| <i>Tilia spp.</i><br>Tiglio                                       | Flowers/infloresce<br>nces/flowering<br>tops<br>(infusion) | Med | Digestive<br>tract<br>disorders                                              | Promotes digestion                           | [15,239,240,2<br>41]                        |           |                                                                                                                                        |
|                                                                   | Flowers/infloresce<br>nces/flowering<br>tops<br>(infusion) | Med | Respirator<br>y tract<br>infections                                          | Cough                                        | [2,13,14,15,2<br>2,204,206,239<br>,240,241] |           |                                                                                                                                        |
| <b>Oleaceae</b>                                                   |                                                            |     |                                                                              |                                              |                                             |           |                                                                                                                                        |
| <i>Fraxinus excelsior</i><br>L.<br>Frassino, Frassino<br>maggiore | Leaves (infusion)                                          | Med | Digestive<br>tract<br>disorders                                              | Laxative, intestinal<br>motility             |                                             |           |                                                                                                                                        |
|                                                                   | Leaves (infusion)                                          | Med | Urinary<br>tract<br>disorders                                                | Diuretic, Urinary<br>tract depurative        | [15,22]                                     |           |                                                                                                                                        |
| <b>Onagraceae</b>                                                 |                                                            |     |                                                                              |                                              |                                             |           |                                                                                                                                        |
| <i>Epilobium sp.</i><br>Epilobio                                  | Leaves (infusion)                                          | Med | Urinary<br>tract<br>disorders                                                | Urinary tract<br>depurative                  | [31,58,59]                                  | [59]      | Anti-inflammatory<br>activity: myricetin-3-O-<br>glucuronide [58,59];<br>oenothein B, myricetine-<br>3-O-glucoside,<br>myricetine-3-O- |
|                                                                   | Leaves (infusion)                                          | Med | General<br>condition                                                         | Anti-inflammatory                            | [58,59]                                     | [58,59]   |                                                                                                                                        |

|                                                                            |                                                                  |     |                              |                                                                |                               |            |                                                                                                                                                                                                                                                                   |
|----------------------------------------------------------------------------|------------------------------------------------------------------|-----|------------------------------|----------------------------------------------------------------|-------------------------------|------------|-------------------------------------------------------------------------------------------------------------------------------------------------------------------------------------------------------------------------------------------------------------------|
|                                                                            |                                                                  |     |                              |                                                                |                               |            | galactoside, myricetine-3-O-rhamnoside and 3-O-glucuronides of quercetin e keampferol [58]                                                                                                                                                                        |
|                                                                            |                                                                  |     |                              |                                                                |                               |            | Antioxidant activity: phenols [58,59]                                                                                                                                                                                                                             |
| <b>Orobanchaceae</b>                                                       |                                                                  |     |                              |                                                                |                               |            |                                                                                                                                                                                                                                                                   |
| <i>Euphrasia rostkoviana</i> Hayne Eufrasia                                | Flowers/inflorescences/flowering tops (compresses with infusion) | Med | Ophthalmic ailments          | Ocular anti-inflammatory                                       | [3,13,15,68,242]              | [31,67,68] | Flavonoids: antioxidant [67]; anti-inflammatory [67,68]<br><br>Polyphenols: anti-inflammatory [68]<br><br>Active substances of the <i>Euphrasia herb</i> : iridoglicozoids (aucubin), tannins, phenolic acids, etheric oils, resin substances and flavonoids [68] |
| <b>Oxalidaceae</b>                                                         |                                                                  |     |                              |                                                                |                               |            |                                                                                                                                                                                                                                                                   |
| <i>Oxalis acetosella</i> L. Cücüli, pan del cucù                           | Leaves (infusion)                                                | Med | Digestive tract disorders    | Digestive                                                      | [3,15]                        |            |                                                                                                                                                                                                                                                                   |
| <b>Papaveraceae</b>                                                        |                                                                  |     |                              |                                                                |                               |            |                                                                                                                                                                                                                                                                   |
| <i>Chelidonium majus</i> L. Celidonia, Erba dei porri                      | Latex or sap (applied raw)                                       | Med | Skin diseases and traumas    | Skin tags and warts                                            | [2,3,13,14,15,55,132,205,206] | [54,55]    | Anti-inflammatory activity: alkaloids [55,132,243] in particular sanguinarine, chelidonine, chelerythrine, berberine e coptisine [243]                                                                                                                            |
| <b>Parmeliaceae</b>                                                        |                                                                  |     |                              |                                                                |                               |            |                                                                                                                                                                                                                                                                   |
| <i>Cetraria islandica</i> (L.) Ach. subsp. <i>islandica</i> Lichene Nichel | Epigeal part (Whole) (infusion)                                  | Med | Respiratory tract infections | Expectorant, decongestant, emollient Sorethroat and hoarseness | [2,3,13,15,18,22,51]          | [50,51,52] | Polysaccharides (lichenan and isolichenan especially active): antitussive [50]; immunomodulating [52];                                                                                                                                                            |

|                                                   |                                                                            |     |                                                              |                                                                                                                |                           |                       |                                                                                                                                                       |
|---------------------------------------------------|----------------------------------------------------------------------------|-----|--------------------------------------------------------------|----------------------------------------------------------------------------------------------------------------|---------------------------|-----------------------|-------------------------------------------------------------------------------------------------------------------------------------------------------|
|                                                   | Epigeal part<br>(Whole)<br>(salve/ointment)                                | Med | General<br>condition                                         | Anti-inflammatory                                                                                              | [51]                      | [51,53]               | (lichenan only) anti-<br>inflammatory [51]                                                                                                            |
| <b>Passifloraceae</b>                             |                                                                            |     |                                                              |                                                                                                                |                           |                       |                                                                                                                                                       |
| <i>Passiflora</i> spp.<br>Passiflora              | Epigeal part<br>(Whole)<br>(infusion)                                      | Med | Nervous<br>system<br>disorders                               | Promotes sleep                                                                                                 | [124,125]                 | [122,123,124,125,126] | Flavonoids and perhaps<br>GABA: ansiolitic [125]                                                                                                      |
| <b>Pinaceae</b>                                   |                                                                            |     |                                                              |                                                                                                                |                           |                       |                                                                                                                                                       |
|                                                   | Resin (topical<br>application)                                             | Med | Oropharyn<br>geal<br>cavity<br>affections                    | Gingivitis,<br>toothache, mouth<br>ulcers and<br>abscesses                                                     |                           |                       |                                                                                                                                                       |
|                                                   | Resin (ointment)                                                           | Med | Skin<br>diseases<br>and<br>traumas                           | Anti-inflammatory,<br>disinfectant and<br>wound healing<br>Sunburns, burns,<br>frostbites, redness<br>and rash | [2,3,14,244]              | [31,87,88]            | Procyanidins and larixinol:<br>antioxidant [244]                                                                                                      |
| <i>Larix decidua</i> Mill.<br>Larice              | Resin (melted,<br>mixed with red<br>wine and applied<br>to put in plaster) | Med | Musculosk<br>eletal<br>system<br>disorders<br>and<br>traumas | Broken bones                                                                                                   | [2,13,15]                 |                       | Lignans and flavonols<br>(wood-bark): anti-<br>inflammatory [87,88],<br>abietane, pimarane, and<br>labdane type diterpenes:<br>anti-inflammatory [87] |
|                                                   | Fruits/infructescen<br>ces/accessory<br>fruits<br>(syrup)                  | Med | Respirator<br>y tract<br>infections                          | Expectorant,<br>decongestant,<br>emollient<br>Cough                                                            | [2,3,13,14,19,<br>87,244] | [88]                  |                                                                                                                                                       |
|                                                   | Buds (syrup)                                                               |     |                                                              |                                                                                                                |                           |                       |                                                                                                                                                       |
|                                                   | Resin (inalation)                                                          |     |                                                              |                                                                                                                |                           |                       |                                                                                                                                                       |
|                                                   | Resin (ointment)                                                           | Med | General<br>condition                                         | Anti-inflammatory                                                                                              | [244]                     | [31,87]               |                                                                                                                                                       |
| <i>Picea abies</i> (L.)<br>H.Karst<br>Abete rosso | Resin (topical<br>application)                                             | Med | Oropharyn<br>geal<br>cavity<br>affections                    | Gingivitis,<br>toothache, mouth<br>ulcers and<br>abscesses                                                     | [15]                      | [88,131,132<br>]      | Antibacterial activity:<br>bark flavonoids [88];<br>piperidine alkaloids<br>(epidihydropinidine) [131]                                                |

|                                                    |                                                     |     |                                  |                                                                                                    |               |                        |                                                                                                                                                                                                              |
|----------------------------------------------------|-----------------------------------------------------|-----|----------------------------------|----------------------------------------------------------------------------------------------------|---------------|------------------------|--------------------------------------------------------------------------------------------------------------------------------------------------------------------------------------------------------------|
|                                                    | Resin (topical application)                         | Med | Skin diseases and traumas        | Anti-inflammatory, disinfectant and wound healing                                                  | [3,132]       |                        | Antifungal activity: epidihydropinidine [131]<br>Antimicrobial: buds E.O. [132]                                                                                                                              |
|                                                    | Buds (syrup)                                        | Med | Respiratory tract infections     | Cough                                                                                              | [3,13,15,242] | [31,88]                | Anti-inflammatory activity: bark stilbens and buds E.O. [132];<br>lignans and bark flavonols [88]<br>Activity antioxidant: bark flavonoids [88]<br>Mucolytic, hyperemic and antiseptic activities: E.O. [31] |
| <i>Pinus cembra</i> L.<br>Pino cembro              | Pine cones (syrup)                                  | Med | Respiratory tract infections     | Cough, Sorethroat                                                                                  | [2]           | [133]<br>Antimicrobial | Phenolics, flavonoids, and proanthocyanidins: antimicrobial activity [133]                                                                                                                                   |
|                                                    | Resin (topical application, ointment)               | Med | Skin diseases and traumas        | Anti-inflammatory, disinfectant and wound healing<br>Sunburns, burns, frostbites, redness and rash |               | [134]                  | E.O. needles, twigs and cones: anti-inflammatory.                                                                                                                                                            |
| <i>Pinus mugo</i> Turra<br>Pino mugo, Pino montano | Resin (topical application)                         | Med | Other medicinal                  | Anti-inflammatory                                                                                  |               | [134]                  | (Prevalence of $\alpha$ -pinene in needles, $\delta$ -3-carene in twigs and cones, limonene in twigs) [134]                                                                                                  |
|                                                    | Immature pine cones (infusion)                      | Med | Digestive tract disorders        | Digestive                                                                                          | [3]           |                        |                                                                                                                                                                                                              |
|                                                    | Resin (melted, filtered and used to put in plaster) | Med | Musculoskeletal system disorders | Sprains and dislocations<br>Broken bones                                                           |               |                        |                                                                                                                                                                                                              |



|                                                          |                                | and traumas |                                 |                                                                                                                                      |                                   |                   |                                                                                                                                                                                                                                                                                                                                                                                                                                                                                                                          |
|----------------------------------------------------------|--------------------------------|-------------|---------------------------------|--------------------------------------------------------------------------------------------------------------------------------------|-----------------------------------|-------------------|--------------------------------------------------------------------------------------------------------------------------------------------------------------------------------------------------------------------------------------------------------------------------------------------------------------------------------------------------------------------------------------------------------------------------------------------------------------------------------------------------------------------------|
|                                                          | Buds (syrup)                   | Med         | Respiratory tract infections    | Expectorant, decongestant, emollient                                                                                                 | [2,3,13,15,19]                    | [135,136]         |                                                                                                                                                                                                                                                                                                                                                                                                                                                                                                                          |
|                                                          | Immature pine cones (syrup)    |             |                                 | Sorethroat and hoarseness<br>Colds<br>Cough                                                                                          |                                   |                   |                                                                                                                                                                                                                                                                                                                                                                                                                                                                                                                          |
|                                                          | Resin (topical application)    | Med         | General condition               | Infections                                                                                                                           |                                   | [134]             |                                                                                                                                                                                                                                                                                                                                                                                                                                                                                                                          |
|                                                          | Resin (topical application)    | Vet         | Cattle                          | Disinfectant and wound healing                                                                                                       |                                   |                   |                                                                                                                                                                                                                                                                                                                                                                                                                                                                                                                          |
| <b>Plantaginaceae</b>                                    |                                |             |                                 |                                                                                                                                      |                                   |                   |                                                                                                                                                                                                                                                                                                                                                                                                                                                                                                                          |
| <i>Plantago major</i> L.<br>Porceléra/ciantàna /plantàna | Leaves (washing with infusion) | Med         | Oropharyngeal cavity affections | Gingivitis, toothache, mouth ulcers and abscesses                                                                                    |                                   | [127,128,129]     | Therapeutic properties due to flavonoids, alkaloids, terpenoids, phenolic compounds (caffeic acid derivatives), iridoid glycosides, fatty acids, polysaccharides, and vitamins.<br>In particular, polyphenols (plantamajoside) and polysaccharides: wound healing activity; Flavonoids (plantagin, baicalein, and hispidulin): antioxidant (may contribute to wound healing)<br>Iridoid glycosides (aucubin) and flavonoids (baicalein and hispidulin): anti-inflammatory; Pectin Polysaccharide II (PMII) antibacterial |
|                                                          | Leaves (applied raw)           | Med         | Skin diseases and traumas       | Acne, pimples, foruncles, skin abscesses<br>Anti-inflammatory, disinfectant and wound healing<br>Skin tags and warts<br>Insect bites | [2,3,13,15,19,22,127,128,130,205] | [127,128,129,130] |                                                                                                                                                                                                                                                                                                                                                                                                                                                                                                                          |
|                                                          | Leaves (infusion)              | Med         | Respiratory tract infections    | Asthmatic bronchitis<br>Cough                                                                                                        | [13,15,127,130]                   | [127,129,130]     |                                                                                                                                                                                                                                                                                                                                                                                                                                                                                                                          |
|                                                          | Leaves (applied as poultice)   | Med         | General condition               | Anti-inflammatory<br>Infections                                                                                                      | [3,13,15,127]                     | [127,128,129]     |                                                                                                                                                                                                                                                                                                                                                                                                                                                                                                                          |
|                                                          | Leaves (applied raw)           | Vet         | All animals                     | Leaves as wound healing                                                                                                              | [13,18,22,127,128,130]            | [127,128,129,130] |                                                                                                                                                                                                                                                                                                                                                                                                                                                                                                                          |

[129]

(Anti urticaria treatment)  
 Ursolic acid, oleanolic acid  
 and  $\alpha$ -linolenic acid:  
 inhibition of COX-2  
 Luteolin: suppresses  
 leukocyte migration and  
 inhibits mast cell  
 degranulation  
 [130]

| <b>Polygonaceae</b>                   |                                             |     |                                              |                                            |                         |                                                                              |
|---------------------------------------|---------------------------------------------|-----|----------------------------------------------|--------------------------------------------|-------------------------|------------------------------------------------------------------------------|
| <i>Rumex acetosa</i> L.<br>Acetosa    | Leaves (eaten raw)                          | Vet | Cattle                                       | Improves milk taste                        |                         |                                                                              |
|                                       | Leaves (applied as poultice)                | Med | Skin diseases and traumas                    | Wound healing, wounds                      | [15,18]                 | [147]<br>(antibacterial)<br>[148]<br>(antibacterial)                         |
|                                       | Leaves (Unknown)                            | Med | Other                                        | Anti-inflammatory                          |                         |                                                                              |
| <i>Rumex alpinus</i> L.<br>Slavàzza   | Leaves (applied as poultice)                | Med | Circulatory system disorders                 | Varicose vein                              | [3,15]                  | Nepodin (2-Acetyl-3-methylnaphthalene-1,8-diol): antibacterial<br>[147,148]  |
|                                       | Leaves (macerated oil, applied as poultice) | Med | Musculoskeletal system disorders and traumas | Anti-inflammatory for joints, Contusions   | [13]                    |                                                                              |
|                                       | Leaves (applied as poultice)                | Med | General condition                            | Soothing                                   |                         |                                                                              |
|                                       | Leaves (boiled and eaten)                   | Vet | Pigs                                         | Boiled leaves                              | [3,15]                  |                                                                              |
| <b>Polypodiaceae</b>                  |                                             |     |                                              |                                            |                         |                                                                              |
| <i>Polypodium vulgare</i> L.<br>Feles | Underground organs (roots/bulbs/tuber)      | Med | Digestive tract disorders                    | Laxative, intestinal motility<br>Vermifuge | [15,22,137,245,246,247] | [137]<br>Resins of the rhizome: anthelmintic; glycosides (polydin): laxative |

|                                                            |                                                                                     |     |                                                          |                                                       |  |                               |                                                                                                                                                                                                                                 |
|------------------------------------------------------------|-------------------------------------------------------------------------------------|-----|----------------------------------------------------------|-------------------------------------------------------|--|-------------------------------|---------------------------------------------------------------------------------------------------------------------------------------------------------------------------------------------------------------------------------|
|                                                            | s/rhizomes)<br>(eaten raw)                                                          |     |                                                          |                                                       |  |                               | [137]                                                                                                                                                                                                                           |
|                                                            | Underground<br>organs<br>(roots/bulbs/tuber<br>s/rhizomes)<br>(cooked and<br>eaten) | Med | General<br>condition                                     | Immunomodulant                                        |  |                               | [137]                                                                                                                                                                                                                           |
| <b>Rosaceae</b>                                            |                                                                                     |     |                                                          |                                                       |  |                               |                                                                                                                                                                                                                                 |
|                                                            | Epigeal part<br>(Whole)<br>(infusion)                                               | Med | Digestive<br>tract<br>disorders                          | Digestive                                             |  |                               | [27,28,248]                                                                                                                                                                                                                     |
| <i>Alchemilla vulgaris</i><br>L.<br>Alchemilla             | Epigeal part<br>(Whole)<br>(macerated oil)                                          | Med | Musculoskeletal<br>system<br>disorders<br>and<br>traumas | Muscle<br>Inflammations and<br>pain<br>Hernia         |  | Anti-<br>inflammatory<br>[28] | [3]<br><br>Quercetin-3-O-b-D-<br>glucopyranoside,<br>quercetin-3-O-b-D-<br>rutinoside, quercetin-3-O-<br>a-D-arabinofuranoside,<br>and 3-O-kaempferol-6-O-<br>(p-coumaroyl)-b-D-<br>glucopyranoside: anti-<br>inflammatory [27] |
|                                                            | Epigeal part<br>(Whole)<br>(infusion)                                               | Med | Nervous<br>system<br>disorders                           | Sedative hypnotic,<br>promotes sleep                  |  |                               | [13]<br><br>Phenols: anti-<br>inflammatory and<br>antioxidant [28]                                                                                                                                                              |
| <i>Crataegus monogyna</i> Jacq.<br>Biancospino             | Flowers/inflorescences/flowering tops<br>(infusion)                                 | Med | Respiratory tract<br>infections                          | Cough                                                 |  | [250]<br>Antibacterial        | [249]                                                                                                                                                                                                                           |
|                                                            | Fruits/infructescences/accessory<br>fruits<br>(infusion)                            | Med | Urinary<br>tract<br>disorders                            | Diuretic, Urinary<br>tract depurative                 |  | [138]<br>(only stalks)        | [2,14,15,138]                                                                                                                                                                                                                   |
| <i>Prunus avium</i> L.<br>Ciliegio                         | Seeds (put in a<br>pillow and heated)                                               | Med | Musculoskeletal<br>system<br>disorders<br>and<br>traumas | Muscle<br>Inflammations and<br>pain<br>Rheumatic pain |  | [251]<br>(heat<br>therapy)    | [15]                                                                                                                                                                                                                            |
| <i>Rosa canina</i> L.<br>Fròsole/Fròsuli<br>(false fruits) | Flowers/inflorescences/flowering<br>tops                                            | Med | Other                                                    | Depurative                                            |  |                               | [15]<br><br>Medicinal properties of <i>R. canina</i> (in particular anti-inflammatory and                                                                                                                                       |

|                                       |                                                                              |     |                              |                             |                            |                                 |                                                                                                                                                                                                                                                            |
|---------------------------------------|------------------------------------------------------------------------------|-----|------------------------------|-----------------------------|----------------------------|---------------------------------|------------------------------------------------------------------------------------------------------------------------------------------------------------------------------------------------------------------------------------------------------------|
|                                       | (infusion)                                                                   |     |                              |                             |                            |                                 | antioxidant activities) due to flavonoids, carotenoids, fatty acids, vitamin C [140]                                                                                                                                                                       |
|                                       | Leaves (infusion)                                                            | Med | Digestive tract disorders    | Laxative Promotes digestion | [3,15]                     |                                 |                                                                                                                                                                                                                                                            |
|                                       | Leaves (infusion)                                                            | Med | Urinary tract disorders      | Depurative                  | [3,13,139,140]             | [139]                           | Particularly: FAs (linoleic and $\alpha$ -linolenic acids); GOPO® (Galactolipid (2S)-1,2-di-O-[(9Z,12Z,15Z)-octadeca-9,12,15-trienoyl]-3-O- $\beta$ -D-galactopyranosyl glycerol); oleanic, ursolic, and betulinic acids: anti-inflammatory activity [140] |
|                                       | Flowers/inflorescences/flowering tops (infusion)                             | Med | Nervous system disorders     | Relaxant                    |                            |                                 |                                                                                                                                                                                                                                                            |
|                                       | Fruits/infructescences/accessory fruits (infusion)                           | Med | Respiratory tract infections | Decongestant Sorethroat     | [3,14,15,139,140]          | [139,140]                       |                                                                                                                                                                                                                                                            |
| <b>Solanaceae</b>                     |                                                                              |     |                              |                             |                            |                                 |                                                                                                                                                                                                                                                            |
| <i>Solanum tuberosum</i> L.<br>Patata | Underground organs (roots/bulbs/tubers/rhizomes) (tubers sliced and applied) | Med | Ophthalmic ailments          | Ocular anti-inflammatory    | [3,15,205]                 | Anti-inflammatory [159,160,161] | Anti-inflammatory activity: glycoalkaloids ( $\alpha$ -chaconine, $\alpha$ -solanine, and solanidine) [159,160]; isolated peptides [161]<br><br>Antioxidant activity: phenolic compounds (chlorogenic acid), proteins (patatins), and peptides [160]       |
| <b>Urticaceae</b>                     |                                                                              |     |                              |                             |                            |                                 |                                                                                                                                                                                                                                                            |
| <i>Urtica dioica</i> L.<br>Ortica     | Leaves (cooked and eaten)                                                    | Med | Circulatory system disorders | Blood depurative            | [13,14,174,175]            | [173,174]                       | Anti-inflammatory activity against muscle pain and rheumatism: acetylcholine, serotonin, formic acid [173]; terpenes and phenols [176]                                                                                                                     |
|                                       | Leaves (infusion)                                                            | Med | Digestive tract disorders    | Digestion, Liver depurative | [2,3,15,22,174,206]        | [173,174]                       |                                                                                                                                                                                                                                                            |
|                                       | Leaves (infusion)                                                            | Med | Urinary tract disorders      | Depurative                  | [2,3,13,15,18,173,174,175] | [173,174]                       |                                                                                                                                                                                                                                                            |

|                                 |     |                                              |                                  |                                 |                      |
|---------------------------------|-----|----------------------------------------------|----------------------------------|---------------------------------|----------------------|
| Leaves (applied as a poultice)  | Med | Musculoskeletal system disorders and traumas | Rheumatism, Contusions, Hematoma | [3,13,14,15,22,173,174,175,205] | [65,173,174,175,176] |
| Epigeal part (Whole) (infusion) | Med | General condition                            | Anti-inflammatory, Corroborant   | [174]                           | [173,174,176]        |

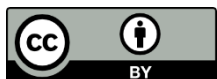

© 2020 by the authors. Submitted for possible open access publication under the terms and conditions of the Creative Commons Attribution (CC BY) license (<http://creativecommons.org/licenses/by/4.0/>).
